# Supplementary material for: Conserved UBE3A subcellular distribution between human and mice is facilitated by non-homologous isoforms
Source: PubMed Central journal article supplement — Hum Mol Genet. 2020 Sep 2;29(18):3032–43. doi: 10.1093/hmg/ddaa194 (PMC7645710; doi:10.1093/hmg/ddaa194), 2020-09-02
Supplement: supplemental_figures_1-3_ddaa194.pdf [file supplemental_figures_1-3_ddaa194.pdf]

# Supplemental Figure 1

**A**

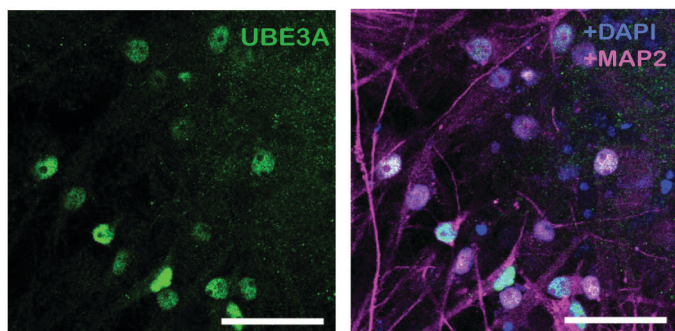

**B**

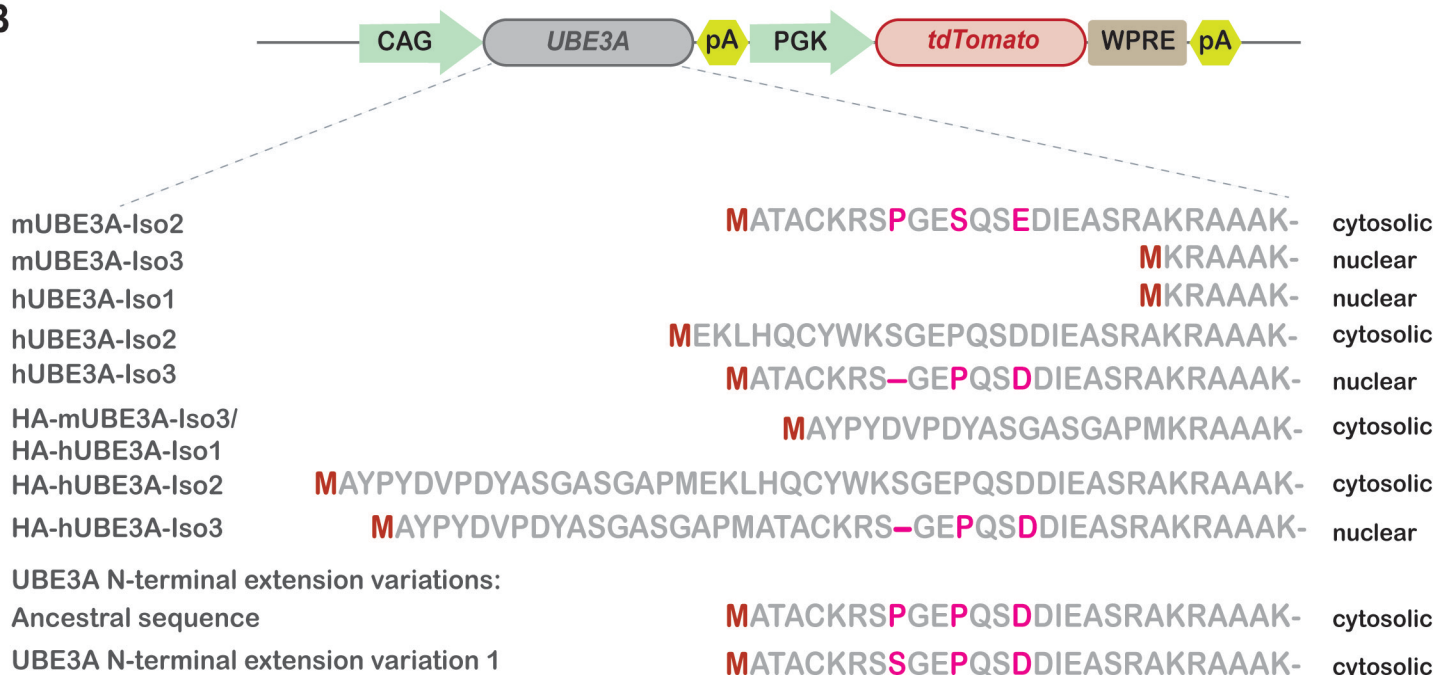

**C**

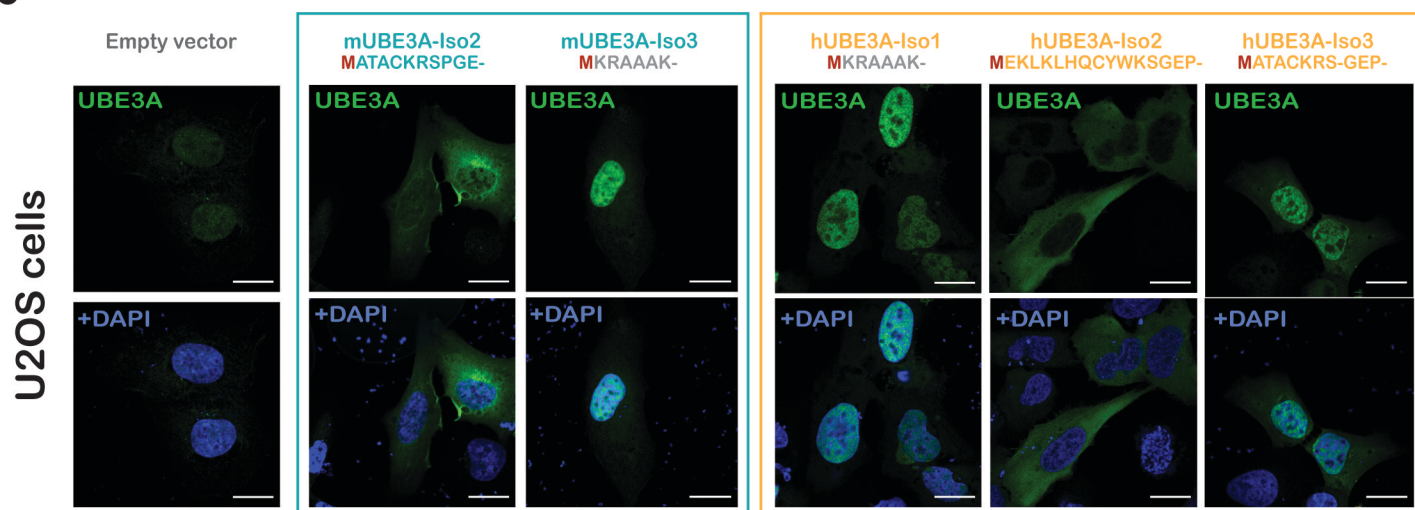

**Figure S1. A.** Staining of endogenous UBE3A in 12-week-old iPSC-derived control neurons. Neurons were stained for UBE3A (green, left panel) together with MAP2 (pink) and DAPI (blue)(right panel). Scale bars, 20μm. **B.** Schematic representation of the dual promoter construct structure and the UBE3A N-terminal sequences that were inserted in the vector. **C.** Localization of the mouse and human isoforms in (non-neuronal) U2OS cells. Scale bars, 20μm.

# Supplemental Figure 2

A

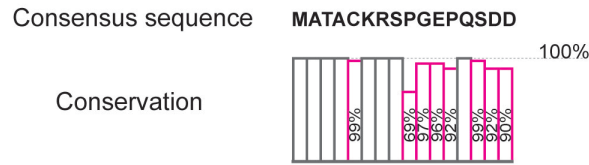

|                                                                         |          |          |  |  |
|-------------------------------------------------------------------------|----------|----------|--|--|
| Human ( <i>Homo sapiens</i> )                                           | MATACKRS | GEPQSDD  |  |  |
| Chimpanzee ( <i>Pan troglodytes</i> )                                   | MATACKRS | GEPQSDD  |  |  |
| Bonobo ( <i>Pan paniscus</i> )                                          | MATACKRS | GEPQSDD  |  |  |
| Orangutan ( <i>Pongo abelii</i> )                                       | MATACKRS | GEPQSDD  |  |  |
| Macaque ( <i>Macaca mulatta</i> )                                       | MATACKRS | GEPQSDD  |  |  |
| Sooty mangabey ( <i>Cercocebus atys</i> )                               | MATACKRS | GEPQSDD  |  |  |
| Ugandan red colobus ( <i>Piliocolobus tephrosceles</i> )                | MATACKRS | GEPQSDD  |  |  |
| Black snub-nosed monkey ( <i>Rhinopithecus bieti</i> )                  | MATACKRS | GEPQSDD  |  |  |
| Nancy Mas night monkey ( <i>Aotus nancymaae</i> )                       | MATACKRS | PGEPQSDN |  |  |
| Black-capped squirrel monkey ( <i>Saimiri boliviensis boliviensis</i> ) | MATACKRS | PGEPQSDD |  |  |
| Common marmoset ( <i>Callithrix jacchus</i> )                           | MATACKRS | PGEPQSDD |  |  |
| Philippine tarsier ( <i>Carlito syrichta</i> )                          | MATACKRS | PEEPQSDD |  |  |
| Northern greater galago ( <i>Otolemur garnettii</i> )                   | MATACKRS | PGEPQSDD |  |  |
| Gray mouse lemur ( <i>Microcebus murinus</i> )                          | MATACKRS | PGEPQSDD |  |  |
| Coquerels sifaka ( <i>Propithecus coquereli</i> )                       | MATACKRS | PREPQSDD |  |  |
| Sunda flying lemur ( <i>Galeopterus variegatus</i> )                    | MATACKRS | PGEPQSDD |  |  |
| Chinese tree shrew ( <i>Tupaia chinensis</i> )                          | MATACKRS | PGEPQSDD |  |  |
| American beaver ( <i>Castor canadensis</i> )                            | MATACKRS | PGEPQSDD |  |  |
| Alpine marmot ( <i>Marmota marmota marmota</i> )                        | MATACKRS | PGEPQSDN |  |  |
| Rat ( <i>Rattus norvegicus</i> )                                        | MATACKRS | SGESQSED |  |  |
| Mouse ( <i>Mus musculus</i> )                                           | MATACKRS | PGESQSED |  |  |
| Algerian mouse ( <i>Mus spretus</i> )                                   | MATACKRS | PGESQSED |  |  |
| Mongolian gerbil ( <i>Meriones unguiculatus</i> )                       | MATACKRS | PGEPQSED |  |  |
| Long-tailed chinchilla ( <i>Chinchilla lanigera</i> )                   | MATACKRS | PGEPQSDD |  |  |
| Common degu ( <i>Octodon degus</i> )                                    | MATACKRS | PGEPQSDD |  |  |
| Damara Mole-rat ( <i>Fukomys damarensis</i> )                           | MATACKRS | PGEPQSDD |  |  |
| Thirteen-lined ground squirrel ( <i>Ictidomys tridecemlineatus</i> )    | MATACKRS | PGEPQSDN |  |  |
| European rabbit ( <i>Oryctolagus cuniculus</i> )                        | MATACKRS | PGEPQSDD |  |  |
| Cow ( <i>Bos taurus</i> )                                               | MATACKRS | SGEPQSDD |  |  |
| Zebu ( <i>Bos indicus</i> )                                             | MATACKRS | SGEPQSDD |  |  |
| Goat ( <i>Capra hircus</i> )                                            | MATACKRS | SGEPQSDD |  |  |
| Sheep ( <i>Ovis aries</i> )                                             | MATACKRS | SGEPQSDD |  |  |
| Minke whale ( <i>Balaenoptera acutorostrata scammoni</i> )              | MATACKRS | SGEPQSDD |  |  |
| Sperm whale ( <i>Physeter catodon</i> )                                 | MATACKRS | SGEPQSDD |  |  |
| Killer whale ( <i>Orcinus orca</i> )                                    | MATACKRS | SGEPQSDD |  |  |
| Narwhal ( <i>Monodon monoceros</i> )                                    | MATACKRS | SGEPQSDD |  |  |
| Bajji ( <i>Lipotes vexillifer</i> )                                     | MATACKRS | SGEPQSDD |  |  |
| Bottlenose dolphin ( <i>Tursiops truncatus</i> )                        | MATACKRS | SGEPQSDD |  |  |
| Wild boar ( <i>Sus scrofa</i> )                                         | MATACKRS | SGEPQSDD |  |  |
| Alpaca ( <i>Vicugna pacos</i> )                                         | MATACKRS | SGESQSDN |  |  |
| Arabian camel ( <i>Camelus dromedarius</i> )                            | MATACKRS | SGESQSDN |  |  |
| Pacific walrus ( <i>Odobenus rosmarus divergens</i> )                   | MATACKRS | PGEPQSDD |  |  |
| Polar bear ( <i>Ursus maritimus</i> )                                   | MATACKRS | PGEPQSDD |  |  |
| Dog ( <i>Canis lupus familiaris</i> )                                   | MATACKRS | PGEPQSDD |  |  |
| Red fox ( <i>Vulpes vulpes</i> )                                        | MATACKRS | PGEPQSDD |  |  |
| Cheetah ( <i>Acinonyx jubatus</i> )                                     | MATACKRS | PGEPQSDN |  |  |
| Canada lynx ( <i>Lynx canadensis</i> )                                  | MATACKRS | PGEPQSDN |  |  |
| Iberian lynx ( <i>Lynx pardinus</i> )                                   | MATACKRS | PGEPQSDN |  |  |
| Cat ( <i>Felis catus</i> )                                              | MATACKRS | PGEPQSDN |  |  |
| Ferret ( <i>Mustela putorius furo</i> )                                 | MATACKRS | PGEPQSDD |  |  |
| Meerkat ( <i>Suricata suricatta</i> )                                   | MATACKRS | PGEPQSDD |  |  |
| Sunda pangolin ( <i>Manis javanica</i> )                                | MATACKRS | PGEPQSDD |  |  |
| Donkey ( <i>Equus asinus asinus</i> )                                   | MATACKRS | PGKPSDD  |  |  |
| Przewalski horse ( <i>Equus przewalskii</i> )                           | MATACKRS | PGKPSDD  |  |  |
| Horse ( <i>Equus caballus</i> )                                         | MATACKRS | PGKPSDD  |  |  |
| Greater horseshoe bat ( <i>Rhinolophus ferrumequinum</i> )              | MATACKRS | PGEPQSDD |  |  |
| Natal long-fingered bat ( <i>Miniopterus natalensis</i> )               | MATACKRS | PGEPQSDD |  |  |
| Pale spear-nosed bat ( <i>Phyllostomus discolor</i> )                   | MATACKRS | PGEPQSDD |  |  |
| David myotis ( <i>Myotis davidii</i> )                                  | MATACKRS | PGEPQSDD |  |  |
| Little brown bat ( <i>Myotis lucifugus</i> )                            | MATACKRS | PGEPQSDD |  |  |
| Brandts bat ( <i>Myotis brandtii</i> )                                  | MATACKRS | PGEPQSDD |  |  |
| Great roundleaf bat ( <i>Hipposideros armiger</i> )                     | MATACKRS | PGEPQSDD |  |  |
| European hedgehog ( <i>Erinaceus europaeus</i> )                        | MATACKRS | PGEPQPD  |  |  |
| Common shrew ( <i>Sorex araneus</i> )                                   | MATACKRS | PGEPQSDD |  |  |
| Star nosed mole ( <i>Condylura cristata</i> )                           | MATACKRS | PGEPQSDD |  |  |
| Nine-banded armadillo ( <i>Dasypus novemcinctus</i> )                   | MATACKRS | PGEPQSDD |  |  |
| Aardvark ( <i>Orycteropus afer afer</i> )                               | MATACKRS | PGEPQSDD |  |  |
| Lesser hedgehog tenrec ( <i>Echinops telfairi</i> )                     | MATACKRS | PGEPQSDD |  |  |
| Cape golden mole ( <i>Chrysochloris asiatica</i> )                      | MATACKRS | PGEPQSDD |  |  |
| West Indian manatee ( <i>Trichechus manatus latirostris</i> )           | MATACKRS | PGEPQSDD |  |  |
| African bush elephant ( <i>Loxodonta africana</i> )                     | MATACKRS | PGEPQSED |  |  |

**B**

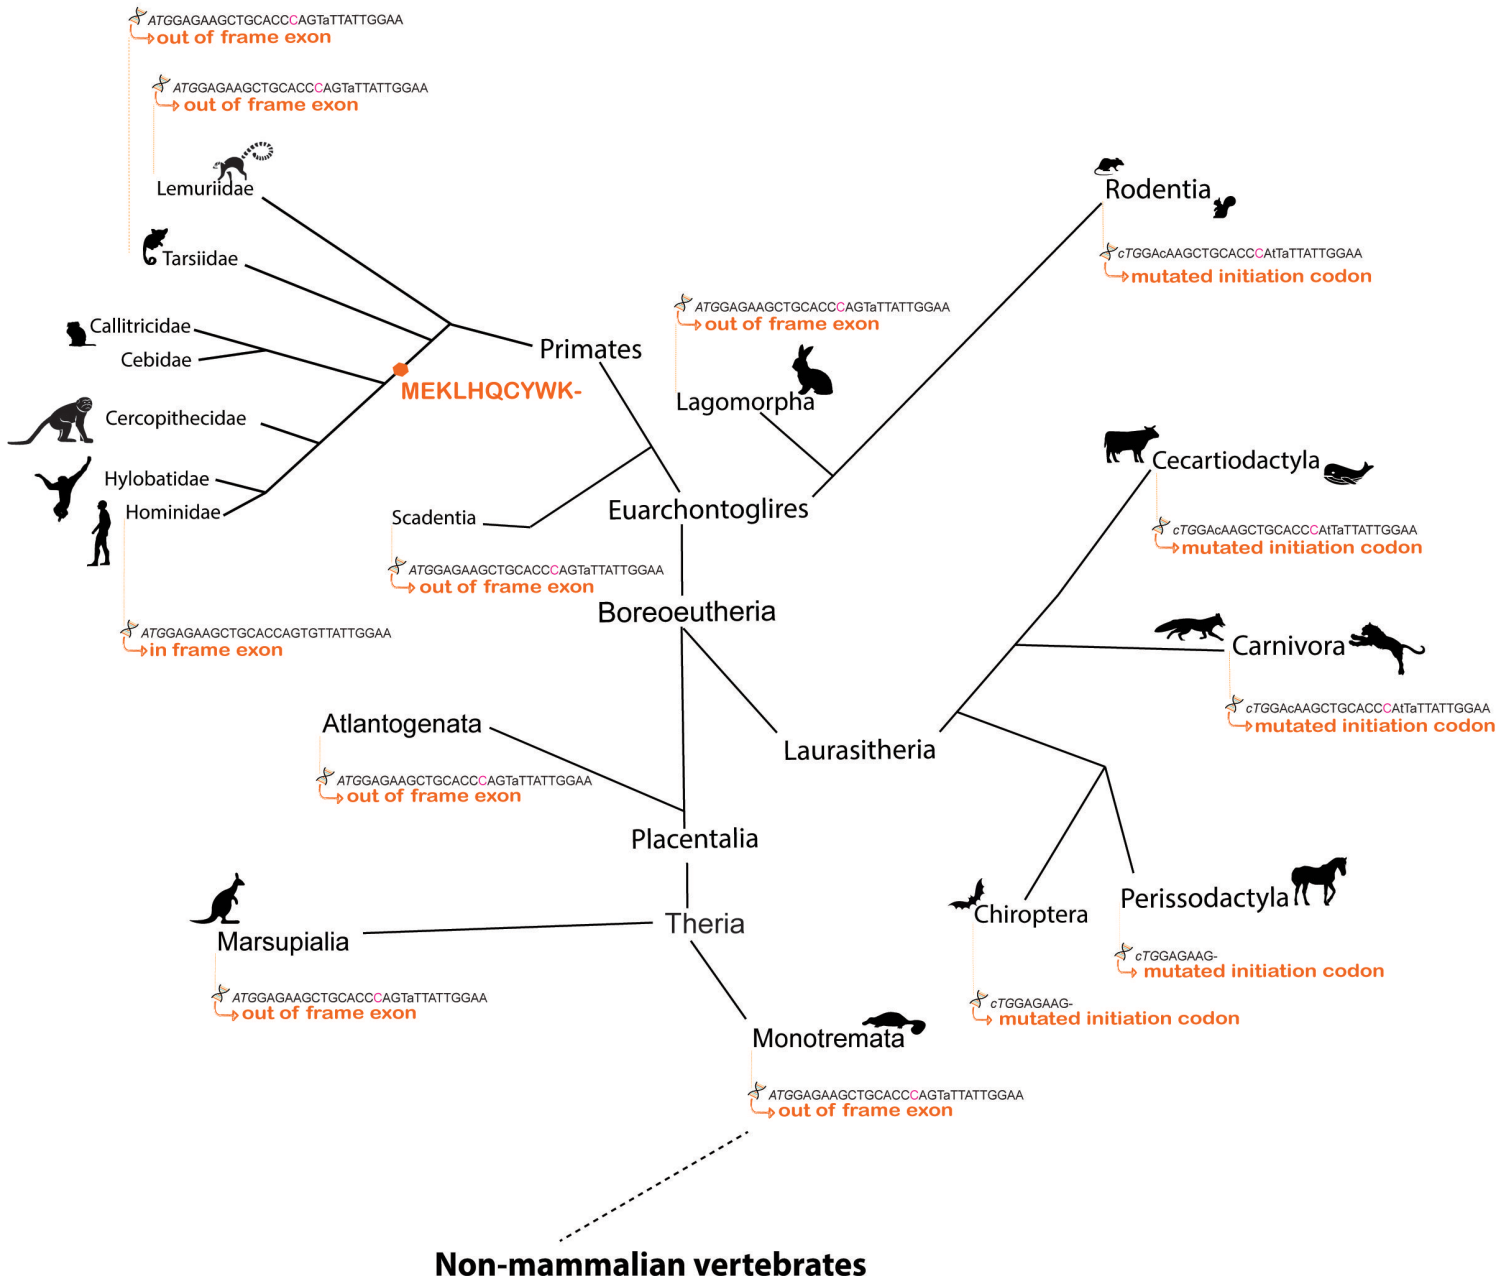

**Figure S2. Multiple alignment of UBE3A N-terminal extensions homologous to hUBE3A-Iso3.**

**A.** The table shows the alignment of UBE3A N-terminal extensions in placental mammals, homologous to the N-terminal extension of hUBE3A-Iso3. Sequences were identified by BLASTP analyses with residues 1-16 of hUBE3A-Iso3. On the left side of the sequence, the common and Latin (in brackets) name for each species is given. On the right of the sequences the family/superfamily or order of the species is indicated, corresponding to Figure 3A. The graph on the top of the table shows the conservation of each amino acid residue during placental mammal evolution. Amino acid residues that are not 100% conserved compared to the 'ancestral' consensus sequence (MATAACKRSPGEPQSDD, shown on top) are colored magenta and are highlighted in all sequences shown. The gradient of highlighting corresponds to the level of conservation of each residue, with light magenta indicating most conserved residues and darker magenta indicating least conserved residues. **B.** Molecular evolution of the sequence of the UBE3A 'MEKL' exon in placental mammals. Nucleotide changes compared to the human sequence are in small letters and nucleotide insertions are indicated in magenta.

## Supplemental Figure 3

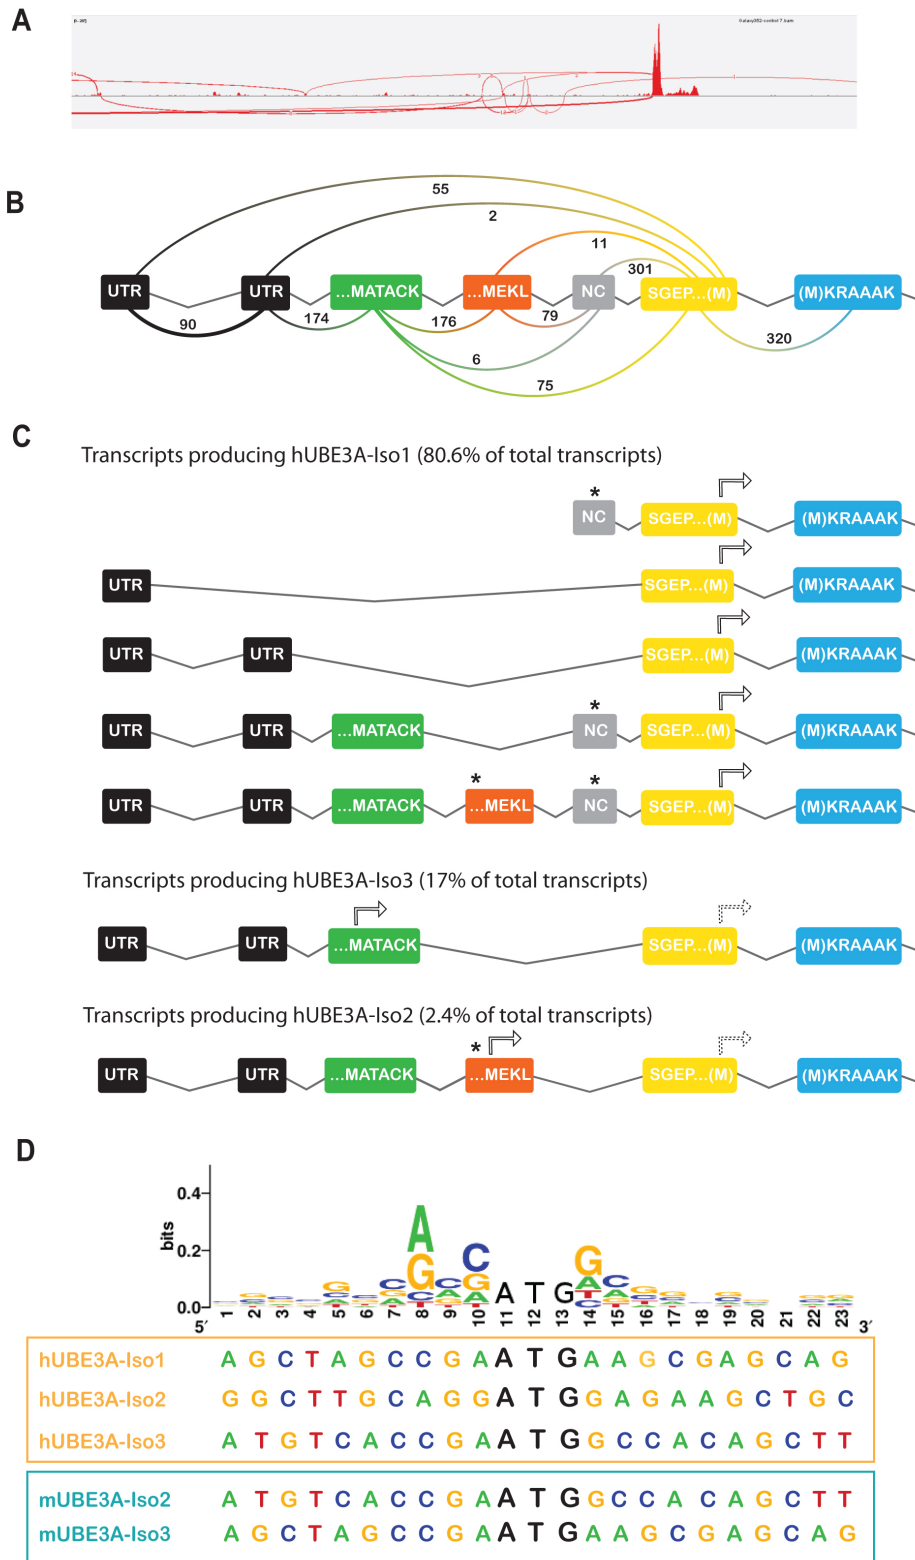

**Figure S3. 5' coding region of the *UBE3A* gene and predicted splicing pattern of transcripts in iPSC-derived neurons.** **A.** Representative image of a Sashimi plot for the human cortex RNA-seq samples. **B.** Schematic representation of the number of *UBE3A* exon junctions found in the hES-derived NPC RNA-seq dataset. **C.** Splicing pattern of predicted *UBE3A* transcripts for the hES-derived NPC RNA-seq dataset. Splicing pattern and relative abundance of each isoform producing transcript were calculated as described in the legend to Figure 4. Putative initiation ATGs (arrows) and stop codons (asterisks) upstream of the initiation ATG are indicated for each predicted transcript. Solid arrows indicate the first possible translation site to produce a full length *UBE3A* isoform. Dashed arrows indicate downstream translation sites possible to produce full length *UBE3A* isoforms. **D.** Top: Consensus Kozak sequence (modified from Wegrzyn et al., 2018). Bottom: alignment of the sequences surrounding the ATGs of human and mouse *UBE3A* isoforms with the consensus Kozak sequence.
