# Supplementary material for: Conserved UBE3A subcellular distribution between human and mice is facilitated by non-homologous isoforms
Source: PubMed Central journal article supplement — Hum Mol Genet. 2020 Sep 2;29(18):3032–43. doi: 10.1093/hmg/ddaa194 (PMC7645710; doi:10.1093/hmg/ddaa194), 2020-09-02
Supplement: supplementary_table_1_ddaa194.pdf [file supplementary_table_1_ddaa194.pdf]

Supplementary Table 1. Alignment of 'MEKL' exon sequences identified in the UBE3A gene locus in mammals and non-mammalian vertebrates.

| Order                  | Species                                                                                     | MEKL exon sequence BLAST result                                                              | ORF?                              |
|------------------------|---------------------------------------------------------------------------------------------|----------------------------------------------------------------------------------------------|-----------------------------------|
| Primates               | Human                                                                                       | <i>CTAGAGAGTTACAGTGGAGGTTAAAAGGAGTGGCTTGCAGG</i> ATG GAGAAGCTGCACCAGTGTATTGGAA <i>GTGA</i>   | yes                               |
|                        | Bonobo                                                                                      | <i>CTAGAGAGTTACAGTGGAGGTTAAAAGGAGTGGCTTGCAGG</i> ATG GAGAAGCTGCACCAGTGTATTGGAA <i>GTGA</i>   | yes                               |
|                        | Gorilla                                                                                     | <i>CTAGAGAGTTACAGTGGAGGTTAAAAGGAGTGGCTTGCAGG</i> ATG GAGAAGCTGCACCAGTGTATTGGAA <i>GTGA</i>   | yes                               |
|                        | Macaque                                                                                     | <i>CTAGAGAGTTACAGTGGAGGTTAAAAGGAGTGGCTTGCAGG</i> ATG GAGAAGCTGCACCAGTGTATTGGAA <i>GTGA</i>   | yes                               |
|                        | Olive Baboon                                                                                | <i>CTAGAGAGTTACAGTGGAGGTTAAAAGGAGTGGCTTGCAGG</i> ATG GAGAAGCTGCACCAGTGTATTGGAA <i>GT</i>     | yes                               |
|                        | Ugandan red colobus                                                                         | <i>CTAGAGAGTTACAGTGGAGGTTAAAAGGAGTGGCTTGCAGG</i> ATG GAGAAGCTGCACCAGTGTATTGGAA <i>GTGA</i>   | yes                               |
|                        | Bolivian squirrel monkey                                                                    | <i>CTAGAGAGTTACAGTGGAGGTTAAAAGGAGTGGCTTGCAGA</i> ATG GAGAAGCTGCACCAGTGTATTGGAA <i>GTGA</i>   | yes                               |
|                        | Marmoset                                                                                    | <i>CTAGAGAGTTACAGTGGAGGTTAGAAGGAGTGGCTTGCAGA</i> ATG GAGAAGCTGCACCAGTGTATTGGAA <i>GTGA</i>   | yes                               |
|                        | Tarsier                                                                                     | <i>CTAGAGAGTTACAGTGGAGGTTAAAAGGAGTGGCTTGCAGG</i> ATG GAGAAGCTGCACCAGTATTATTGGAA <i>GTGA</i>  | no - Insertion, out of frame exon |
|                        | Bushbaby                                                                                    | <i>CTAGAGAGTTACAGTGGAGGTTAAAAGGAGTGGCTTGCAGG</i> ATG GAGAAGCTGCACCAGTATTATTGGAA <i>GTGA</i>  | no - Insertion, out of frame exon |
| Mouse lemur            | <i>ATAGAGAGTTACAGTGGAGGTTAAAAGGAGTGGCTTACAGG</i> ATG GAGAACCTGCACCAGTATTATTGGAA <i>GTGA</i> | no - Insertion, out of frame exon                                                            |                                   |
| Lagomorphs             | Rabbit                                                                                      | <i>CTAGAGAGTTACAGTGGAGGTTAAAAGGAGTGGCTTGCAGG</i> ATG GAGAAGCTGCACCAGTATTATTGGAA <i>GTGA</i>  | no - Insertion, out of frame exon |
| Rodents                | American beaver                                                                             | AGTGGCTTaCAGa ATG GAGAAGtTataCTCAGTGTATTGGAA                                                 | no - Insertion, out of frame exon |
|                        | Arctic ground squirrel                                                                      | <i>CTAGAGcGTTAtAGTGGAGGcAAAAG-AGTaGCTTaCAGG</i> ATa GAGAAGCTGCACCAtTgGaaATgatcc              | no - mutated ATG codon            |
|                        | Daurian ground squirrel                                                                     | AAAAaAGTAGCTTACAGG ATa GAGAAGCTGCACCAtTgGaaATgatcc                                           | no - mutated ATG codon            |
|                        | Squirrel                                                                                    | <i>CTAGAGAGTTAtAGTGGAGGcAAAAG-AGTaGCTTaCAGG</i> ATa GAGAAGCTGCACCAtTgGaaATgatcc              | no - mutated ATG codon            |
|                        | Naked mole rat                                                                              | <i>CTAGAGAGTTACAGTGAAGtTAAAAGGAGTGGCTTaCacG</i> ATG GAGAAGCTaCACCAGTGTATTGGAA <i>GTGA</i>    | yes                               |
|                        | Galilee mountains blind mole rat                                                            | <i>CTAGAGAGTTACAGTGGAGtTAAAAGGAGTGGCTTaCAGG</i> ATG GAGAAGCTGCACCCTGTGTAAATGGAA <i>GTGA</i>  | no - Insertion, out of frame exon |
| Ungulates              | Damara mole rat                                                                             | <i>CTAGAGAGTTACAGTGAAGtTAAAAGGAGTGGTTaCacA</i> gTG GAGAAGCTGCACCAGTGTACTGGGA <i>GTGA</i>     | no - mutated ATG codon            |
|                        | Mouse                                                                                       | <i>CTAGAGAGTTACAGTGGAGtTAAAAGTgcacctTTaCctc</i> cTt aAaAgG                                   | no - mutated ATG codon            |
|                        | Wild yak                                                                                    | <i>CCAGAGAGTTACAGTGGaAGtTAAAGGAGgGcCTTGCAGT</i> cca GAGAAGCTGCACCtcataaaaa                   | no - mutated ATG codon            |
|                        | Domestic yak                                                                                | <i>CCAGAGAGTTACAGTGGaAGtTAAAGGAGgGcCTTGCAGT</i> cca GAGAAGCTGCACCtcataaaaa                   | no - mutated ATG codon            |
|                        | American bison                                                                              | <i>CCAGAGAGTTACAGTGGaAGtTAAAGGAGgGcCTTGCAGT</i> cca GAGAAGCTGCACCtcataaaaa                   | no - mutated ATG codon            |
|                        | Bos indicus                                                                                 | <i>CCAGAGAGTTACAGTGGaAGtTAAAGGAGgGcCTTGCAGT</i> cca GAGAAGCTGCACCtcataaaaa                   | no - mutated ATG codon            |
|                        | Sheep                                                                                       | <i>CCAGAGAGTTACAGTGGaAGtTAAAGGAGgGcCTTGCAGT</i> ccc GAGAAGCTGCACCtcataaaaa                   | no - mutated ATG codon            |
|                        | Sus scrofa                                                                                  | <i>CCAGAGAGTTACAGTGGaAGtTAAAGGAGgGcCTTGCAGT</i> ccc GAGAAGCTGCACCtcataaaaa                   | no - mutated ATG codon            |
|                        | Arabian camel                                                                               | <i>CAGGAGAGTTAgAGTGGAGaTgAAAGGAGTGGCTTGCAGG</i> cTa GAGAAGCTGCACC <i>TAGTaTTAcTGGAAGTGA</i>  | no - mutated ATG codon            |
|                        | Alpaca                                                                                      | <i>CAGGAGAGTTAgAGTGGAGGtTgAAAGGAGTGGCTTGCAGG</i> cTa GAGAAGCTgTACC <i>TAGTaTTAcTGGAAGTGA</i> | no - mutated ATG codon            |
| Carnivores             | Horse                                                                                       | <i>CTAGAGAGTTACACTGGAGGtCAAAAGGAGTGGCTCGCAGG</i> cTG GAGAAGCCTaCAttt                         | no - mutated ATG codon            |
|                        | Donkey                                                                                      | <i>CTAGAGAGTTACAcTGGAGGtCAAAAGGAGTGGCTTGCAGG</i> cTG GAGAAGCCTaCAttt                         | no - mutated ATG codon            |
|                        | Cat                                                                                         | <i>CTAGATAGTTAtcGTGGAGGtAgAAGGAGTGGCTTGCtGG</i> cTG GAcAAGCTGCACC <i>CAtTaTTATTGGAAGTGA</i>  | no - mutated ATG codon            |
|                        | Canada Lynx                                                                                 | <i>CTAGAtAGTTAtcGTGGAGGtAgAAGGAGTGGCTTGCtGG</i> cTG GAcAAGCTGCACC <i>CAtTaTTATTGGAAGTGA</i>  | no - mutated ATG codon            |
|                        | Tiger                                                                                       | <i>CTAGAtAGTTAtcGTGGAGGtAgAAGGAGTGGCTTGCtGG</i> cTG GAcAAGCTGCACC <i>CAtTaTTATTGGAAGTGA</i>  | no - mutated ATG codon            |
|                        | Leopard                                                                                     | <i>CTAGAtAGTTAtcGTGGAGGtAgAAGGAGTGGCTTGCtGG</i> cTG GAcAAGCTGCACC <i>CAtTaTTATTGGAAGTGA</i>  | no - mutated ATG codon            |
|                        | Dog                                                                                         | <i>GTAGAGAGTTACAGTGGAGGtTAAAAGGAGTGGCTTGCAtg</i> cTG GAtAAGCTaCACcTGT <i>TaTTATTGGAAGTGA</i> | no - mutated ATG codon            |
|                        | Red fox                                                                                     | <i>GTAGAGCATTACAGTGGAGGtTAAAAGGAGTGGCTTGCAtg</i> cTG GAtAAGCTaCACcTGT <i>TaTTATTGGAAGTGA</i> | no - mutated ATG codon            |
| Marsupials             | Polar bear                                                                                  | <i>CTAAAGAGTTtCAGTGAAGTAAAAGGAGTGGCTTGCAGG</i> cTG GAcAAGCTGCACCcGTt <i>TtTTGGAAGTGA</i>     | no - mutated ATG codon            |
|                        | Asiatic black bear                                                                          | <i>CTAAAGAGTTtCAGTGAAGTAAAAGGAGTGGCTTGCAGG</i> cTG GAcAAGCTGCACCcGTt <i>TtTTGGAAGTGA</i>     | no - mutated ATG codon            |
|                        | Koala                                                                                       | <i>CTAGAGAGTTACAGTGGAGGtAgAAGGAGTGGCTTGCAGG</i> ATG GAGAAGCTGCACCAGTATTATTGGAA <i>GTGA</i>   | no - Insertion, out of frame exon |
| Other mammals          | Wombat                                                                                      | <i>CTAGAGAGTTACAGTGGAGGtAgAAGGAGTGGCTTGCAGA</i> ATG GAGAAGCTGCACCAGTGTATTATTGGAA <i>GTGA</i> | no - Insertion, out of frame exon |
|                        | Sloth                                                                                       | <i>CTAGAGAGTTACAGTGGAGGtTAAAAGGAGTGGCTTGCAGG</i> ATG GAGAAGCTGCACCAGTATTATTGGAA <i>GTGA</i>  | no - Insertion, out of frame exon |
|                        | Hyrax                                                                                       | <i>TTAGAGAGTTACAGTGGAGGtAAAGAGGAGTGGCTTGCAGGATG</i> GAGAAGtTgTACCAGTATTATTGGAA <i>GTGA</i>   | no - Insertion, out of frame exon |
|                        | Armadillo                                                                                   | <i>CTAGAGAGTTACAGTGGAGGtTAAAAGGAGTGGCTTGCAGG</i> ATG GAGAAGCTGCACCAGTATTATTGGAA <i>GTGA</i>  | no - Insertion, out of frame exon |
|                        | Tree shrew                                                                                  | <i>CTAGAGAGTTACAGTGAAGTAAATGGAGTGGCTTGCAGA</i> gTG GAGAAGCTGCACCAGTATTATTGGAA <i>GTGA</i>    | no - mutated ATG codon            |
| Non-mammal vertebrates | Chicken                                                                                     | <i>CTAGgGAGTTAgAGTGGAGGtTAAAAGGAGgGcCTTGCAGa</i> ATG GAGAAGtTgCtCCcTGTGTgTTGGAA <i>CGGA</i>  | no - Insertion, out of frame exon |
|                        | Mallard                                                                                     | <i>CTAGgGAGTTACAGTGGAGGtTAAAAGGAGgGcCTTGCAGa</i> ATG GAGGAGtTgCtCCcTGTGTgTTGGAA <i>GTGA</i>  | no - Insertion, out of frame exon |
|                        | West African turtle                                                                         | <i>CTAGgGAGTTACAGTGGAGGtTAAAAGGAAATGGCTTGCAGA</i> ATG GAGAAGtTgCtCCcAGTGTgTTGGAA <i>GTGA</i> | no - Insertion, out of frame exon |

|                                             |
|---------------------------------------------|
| Nucleotide change : small letter            |
| Insertion : bold magenta letter             |
| Gap : -                                     |
| In frame ATG : red                          |
| Intronic sequence: italicized green letters |
