# Supplementary material for: Conserved UBE3A subcellular distribution between human and mice is facilitated by non-homologous isoforms
Source: PubMed Central journal article supplement — Hum Mol Genet. 2020 Sep 2;29(18):3032–43. doi: 10.1093/hmg/ddaa194 (PMC7645710; doi:10.1093/hmg/ddaa194), 2020-09-02
Supplement: supplementary_table_2_ddaa194.pdf [file supplementary_table_2_ddaa194.pdf]

**Supplementary Table 2.** Oligonucleotides used in this study

| <b>Oligonucleotide ID number</b> | <b>Purpose</b>                                                        | <b>Sequence</b>                                                                                         |
|----------------------------------|-----------------------------------------------------------------------|---------------------------------------------------------------------------------------------------------|
| P3274                            | Cloning hUBE3A-Iso2<br>(Forward)                                      | ggc gcg cct ATG GAG AAG CTG CAC CAG TGT TAT TGG AAA<br>TCA GGA GAA CCT CAG TCT GAC                      |
| P2918                            | Cloning hUBE3A-Iso3<br>(Forward)                                      | ggc gcg cct ATG GCC ACA GCT TGT AAA AGA TCA GGA<br>GAA CCT CAG TCT GA                                   |
| P2919                            | Cloning hUBE3A-Iso3/2<br>(Reverse)                                    | gc ggc cgc TTA CAG CAT GCC AAA TCC TTT GG                                                               |
| P3101                            | Cloning m <sup>ext2</sup> hUBE3A-Iso3<br>(Forward)                    | ggc gcg cc t ATG GCC ACA GCT TGT AAA AGA TCA CCA GGA<br>GAA TCC CAG TCT GAG GAC ATT GAA GCT AGC CGA ATG |
| P3102                            | Cloning h <sup>ext3</sup> mUBE3A-Iso2<br>(Forward)                    | ggc gcg cc t ATG GCC ACA GCT TGT AAA AGA TCA GGA GAA<br>CCT CAG TCT GAC GAC ATT GAA GCT AGC CGA ATG     |
| RA109                            | Cloning h <sup>ext3</sup> mUBE3A-Iso2<br>(Reverse)                    | GCC AAG TTC GGT TTC TAG TG                                                                              |
| P3271                            | Ancestral UBE3A 'MATAACK'<br>N-terminal extension<br>(Forward)        | ggc gcg cct ATG GCC ACA GCT TGT AAA AGA TCA CCT GGA<br>GAA CCT CAG TCT GAC GAC ATT GAA GC               |
| P3273                            | Cercartiodactyla UBE3A<br>'MATAACK' N-terminal<br>extension (Forward) | ggc gcg cct ATG GCC ACA GCT TGT AAA AGA TCA TCG GGA<br>GAA CCT CAG TCT GAC GAC ATT GAA GC               |
