# Supplementary material for: Conserved UBE3A subcellular distribution between human and mice is facilitated by non-homologous isoforms
Source: PubMed Central journal article supplement — Hum Mol Genet. 2020 Sep 2;29(18):3032–43. doi: 10.1093/hmg/ddaa194 (PMC7645710; doi:10.1093/hmg/ddaa194), 2020-09-02
Supplement: supplementary_table_3_ddaa194.pdf [file supplementary_table_3_ddaa194.pdf]

**Supplementary Table 3.** Plasmids used in this study

| <b>Plasmid ID number</b> | <b>Insert</b>                                              | <b>Purpose</b>                    |
|--------------------------|------------------------------------------------------------|-----------------------------------|
| pYE702                   | mUBE3A-Iso3                                                | Overexpression in mammalian cells |
| pYE789                   | mUBE3A-Iso2                                                | Overexpression in mammalian cells |
| pYE1011                  | hUBE3A-Iso1                                                | Overexpression in mammalian cells |
| pYE1096                  | hUBE3A-Iso3                                                | Overexpression in mammalian cells |
| pYE1458                  | hUBE3A-Iso3 with Ancestral UBE3A 'MATAACK' extension       | Overexpression in mammalian cells |
| pYE1459                  | hUBE3A-Iso3 with Cetartiodactyla UBE3A 'MATAACK' extension | Overexpression in mammalian cells |
| pYE1486                  | hUBE3A-Iso2                                                | Overexpression in mammalian cells |
| pYE1579                  | HA-mUBE3a-Iso3                                             | Overexpression in mammalian cells |
| pYE1625                  | h <sup>ext3</sup> mUBE3A-Iso2                              | Overexpression in mammalian cells |
| pYE1626                  | m <sup>ext2</sup> hUBE3A-Iso3                              | Overexpression in mammalian cells |
| pSB841                   | HA-hUBE3a-Iso1                                             | Overexpression in mammalian cells |
| pSB842                   | HA-hUBE3a-Iso2                                             | Overexpression in mammalian cells |
| pSB861                   | HA-hUBE3a-Iso3                                             | Overexpression in mammalian cells |
